# Supplementary material for: Isotactic-Polypropylene/Atactic-Polystyrene Miktoarm Star Copolymers: Synthesis and Aggregation Morphology
Source: MDPI journal article supplement (doi:10.3390/polym11101574), 2019-09-27
Supplement: s1 [file s1]

Supporting Information

# Isotactic-Polypropylene/Atactic-Polystyrene Miktoarm Star Copolymers: Synthesis and Aggregation Morphology

Yuanjie Wang, Xinzhi Liu, Liying Liu, Hui Niu\*

State Key Laboratory of Fine Chemicals, Department of Polymer Science and Engineering, School of Chemical Engineering, Dalian University of Technology, Dalian 116024, China

E-mail address: hniu@dlut.edu.cn

Table S1. Purification of *i*PP/*a*PS miktoarm star copolymers <sup>a</sup>.

| Samples | Miktoarm Star Copolymer (g) | Miktoarm Star Copolymer Yield (wt %) | THF Soluble at r.t. ( <i>a</i> PS wt %) | THF Insoluble under Reflux ( <i>i</i> PP wt %) |
|---------|-----------------------------|--------------------------------------|-----------------------------------------|------------------------------------------------|
| S-1     | 0.460                       | 46.0                                 | 9.0                                     | 45.0                                           |
| S-2     | 0.570                       | 57.0                                 | 11.0                                    | 32.0                                           |
| S-3     | 0.550                       | 55.0                                 | 8.5                                     | 36.5                                           |

<sup>a</sup> The *a*PS homopolymer was removed by THF dialyzing at room temperature (r.t.) for 24h; the *i*PP homopolymer was removed by Soxhlet extraction with boiled THF for 10 h; after the extraction the soluble part was collected to get the purified miktoarm star copolymer.

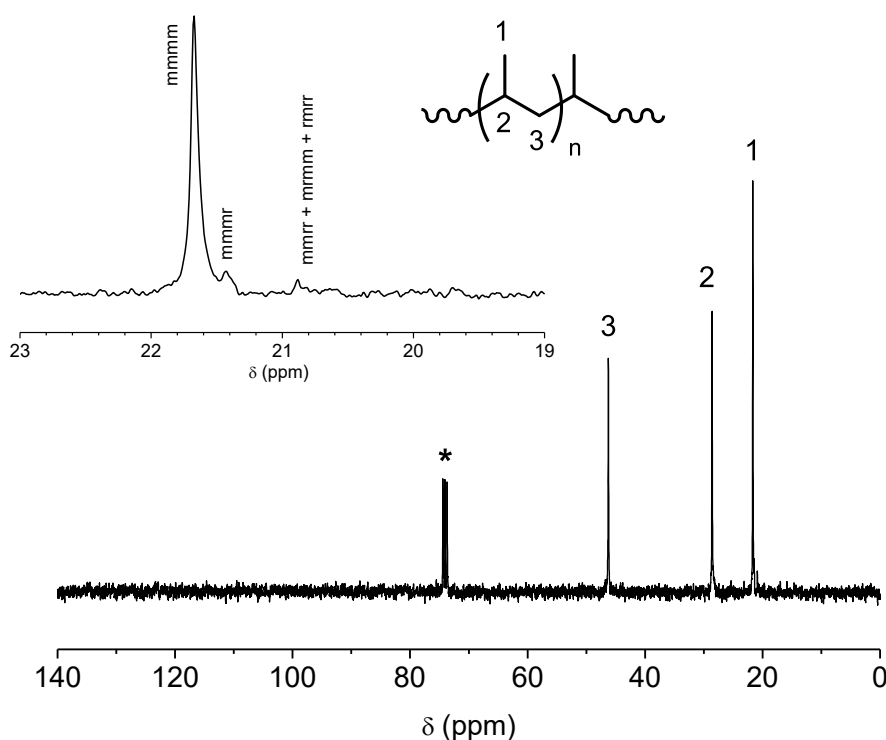

Figure S1. <sup>13</sup>C-NMR spectrum of the CH<sub>3</sub>OSi-terminated *i*PP arm precursor.

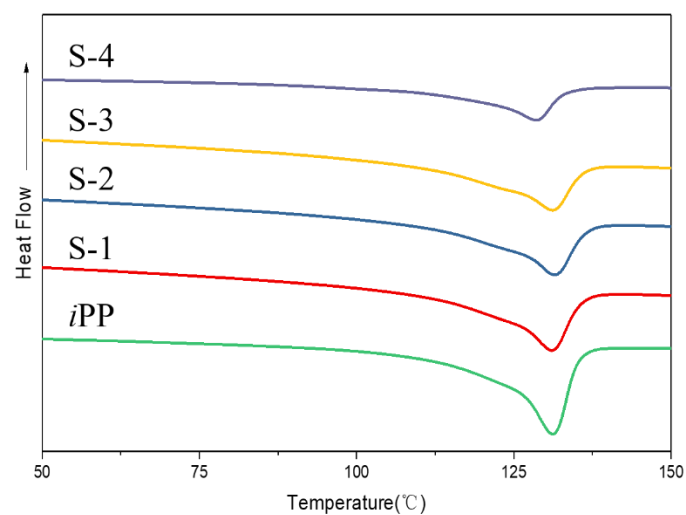

**Figure S2.** DSC heating curves of the *iPP* arm precursor and *iPP/aPS* miktoarm star copolymers (all graphics have the same ordinate units).

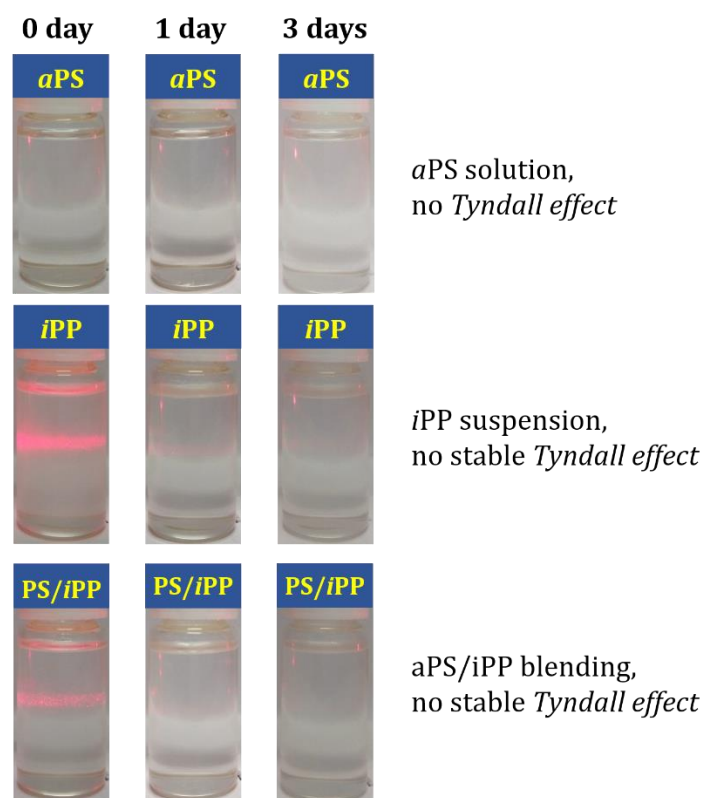

**Figure S3.** Photographs of *iPP* and *aPS* homopolymer and their blends solution irradiated by a laser beam.

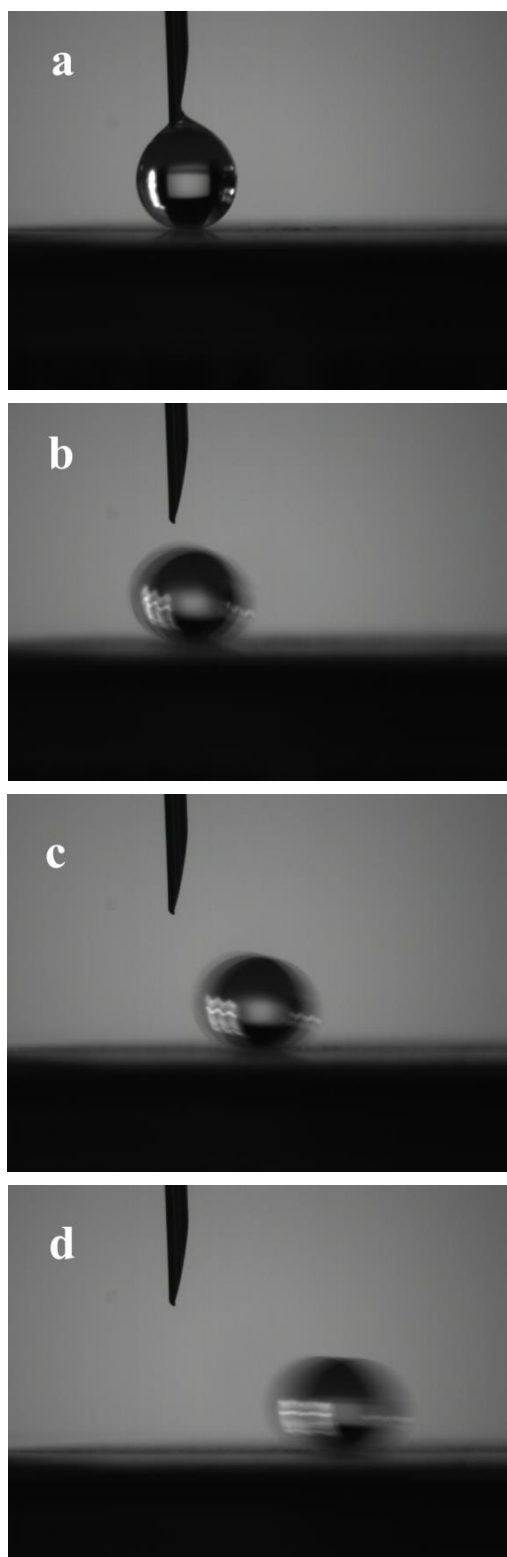

**Figure S4.** The rolling of water drop on the S-(2+3) surface with inclined angle of 1.5°.
